# Supplementary material for: Enhancing generation efficiency of liver organoids in a collagen scaffold using human chemically derived hepatic progenitors
Source: PubMed Central journal article supplement — Ann Hepatobiliary Pancreat Surg. 2023 Sep 4;27(4):342–9. doi: 10.14701/ahbps.23-052 (PMC10700938; doi:10.14701/ahbps.23-052), 2023-09-04
Supplement: ahbps-27-4-342-supple.pdf [file ahbps-27-4-342-supple.pdf]

**Supplementary Table 1.** Clinical characteristics of liver donors

| Donor                                | 1                          | 2           |
|--------------------------------------|----------------------------|-------------|
| Ethnicity                            | Asian                      | Asian       |
| Sex                                  | Female                     | Male        |
| Age (yr)                             | 54                         | 33          |
| Body mass index (kg/m <sup>2</sup> ) | 24.9                       | 23.5        |
| Diagnosis                            | Intrahepatic stone         | Liver donor |
| Operation                            | Left lateral sectionectomy | Laparo RHH  |
| Child-Pugh score                     | N/A                        | N/A         |
| Albumin (g/dL)                       | 4                          | 4.7         |
| PT (INR)                             | 1.05                       | 0.94        |
| Total bilirubin (mg/dL)              | 0.46                       | 0.7         |
| ALP (U/L)                            | 67                         | 72          |
| AST (U/L)                            | 24                         | 16          |
| ALT (U/L)                            | 17                         | 10          |
| Hepatitis                            | None                       | None        |
| Alcohol use                          | N/A                        | N/A         |
| Smoker                               | N/A                        | N/A         |
| Specimen weight (g)                  | N/A                        | 0.42        |

PT, prothrombin time; INR, international normalized ratio; ALP, alkaline phosphatase; AST, aspartate aminotransferase; ALT, alanine aminotransferase; RHH, right hemihepatectomy; N/A, not available.

**Supplementary Table 2.** List of antibodies used in this study

| Name          | Supplier                 | Cat no.  |
|---------------|--------------------------|----------|
| Albumin       | Cedarlane                | CL2513A  |
| CK18          | Abcam                    | ab668    |
| ASGR1         | Santa Cruz Biotechnology | SC-52623 |
| Ki67          | abcam                    | ab92742  |
| EPCAM         | Abcam                    | ab32392  |
| E-CAD         | Biosciences              | 610181   |
| Hoechst 33342 | Life Technologies        | H3570    |

**Supplementary Table 3.** List of primers used in this study

| Name   | Sequence forward        | Reverse                   | Supplier |
|--------|-------------------------|---------------------------|----------|
| CD44   | CATCTACCCAGCAACCCTA     | CTGTCTGTGCTGTCGGTGAT      | Macrogen |
| CD90   | CTAGTGGACCAGAGCCTTCG    | ACAGGGACATGAAATCCGTG      | Macrogen |
| ITGA6  | TCGCTGGGATCTTGATGCTTGC  | TGAGCATGGATCTCAGCCTTGTG A | Macrogen |
| FOXJ1  | CCTGTCGGCCATCTACAAGT    | AGACAGGTTGTGGCGGATT       | Macrogen |
| SOX9   | GAGGAAGTCGGTGAAGAACG    | ATCGAAGGTCTCGATGTTGG      | Macrogen |
| EpCAM  | GAACAATGATGGGCTTTATG    | TGAGAATTCAGGTGCTTTTT      | Macrogen |
| CK19   | TCCGAACCAAGTTTGAGACG    | CCCTCAGCGTACTGATTCC       | Macrogen |
| ALB    | CACAGAATCCTTGGRGAACAGG  | ATGGAAGGTGAATGTTTCAGCA    | Macrogen |
| HNF4a  | CCAAAACCCTCGTCGACATG    | GCACATTCTCAAATCCAGG       | Macrogen |
| AAT    | TATGATGAAGCGTTTAGGC     | CAGTAATGGACAGTTTGGGT      | Macrogen |
| ASGR1  | CAGCAACTTCACAGCCAGCA    | AGCTGGGACTCTAGCGACTT      | Macrogen |
| CYP1A2 | CGGACAGCACTTCCCTGAGA    | AGGCAGGTAGCGAAGGATGG      | Macrogen |
| CYP3A4 | TTCAGCAAGAAGAACAAGGACAA | GGTTGAAGAAGTCCTCCTAAGC    | Macrogen |
| GAPDH  | TGCACCACCAACTGCTTAGC    | GGCATGGACTGTGGTCATGAG     | Macrogen |
